# Getting personal: how vaccination exemptions shape herd immunity

Emma R. Nedell<sup>1, \*</sup>, Romain Garnier<sup>1, \*, +</sup>, Saad B. Omer<sup>2</sup>, and Shweta  
Bansal<sup>1</sup>

<sup>1</sup>Department of Biology, Georgetown University, Washington, DC, United  
States

<sup>2</sup>Hubert Department of Global Health, Rollins School of Public Health,  
Emory University, Atlanta, GA, United States

\*Equal contribution

+Corresponding author: rg1114@georgetown.edu

## Abstract

**Background:** State-mandated school entry immunization requirements in the United States play an important role in achieving high vaccine coverage and preventing outbreaks of vaccine-preventable diseases. Most states allow non-medical exemptions that let children remain unvaccinated on the basis of personal beliefs. However, the ease of obtaining such exemptions varies, resulting in a patchwork of state vaccination exemption laws, contributing to heterogeneity in vaccine coverage across the country. In this study, we evaluate epidemiological effects and spatial variations in non-medical exemption rates in the context of vaccine

policies.

**Methods and Findings:** We first analyzed the correlation between non-medical exemption rates and vaccine coverage for three significant childhood vaccinations and found that higher rates of non-medical exemptions were associated with lower vaccination rates of school-aged children in all cases. We then identified a subset of states where exemption policy has recently changed and found that the effects on statewide non-medical exemption rates varied widely. Focusing further on Vermont and California, we illustrated how the decrease in non-medical exemptions due to policy change was concurrent to an increase in medical exemptions (in CA) or religious exemptions (in VT). Finally, a spatial clustering analysis was performed for Connecticut, Illinois, and California, identifying clusters of high non-medical exemption rates in these states before and after a policy change occurred. The clustering analyses show that policy changes affect spatial distribution of non-medical exemptions within a state.

**Conclusions:** Our work suggests that vaccination policies have significant impacts on patterns of herd immunity. Our findings can be used to develop evidence-based vaccine legislation.

**Keywords:** Herd immunity, Disease ecology, Immunization

## Introduction

1 Immunization requirements for school-entry date back to 1922 and have played a key role in  
2 achieving high levels of vaccine coverage against communicable diseases in the United States  
3 [1]. This patchwork of childhood immune protection, however, is punctured by a hetero-  
4 geneous set of state-specific vaccination exemption rules. Medical exemptions to mandated  
5 vaccinations are available in all 50 states, and 47 offer non-medical exemptions in some form.  
6 Namely, 18 states offer personal belief exemptions for those who object to vaccinations for  
7 philosophical or moral reasons. In the remaining states offering non-medical exemptions,  
8 they are limited to religious beliefs. In the remaining three states (California, Mississippi,  
9 and West Virginia), only medical exemptions are available. While this has been the policy  
10 in Mississippi and West Virginia for decades [2], the ban on non-medical exemptions in Cal-  
11 ifornia (enacted by CA Senate Bill 277 in January 2016) was motivated by the 2015 measles  
12 outbreak in the state [3] in which suboptimal vaccination rates in school-aged children was  
13 an important factor in the magnitude of the outbreak [4].

14 The ease of obtaining non-medical exemptions varies widely depending on state public health  
15 policies, from requiring a simple signature from the parents to obtaining a notarized doc-  
16 ument [5]. Generally, higher rates of non-medical exemptions are found in states where  
17 policies are more permissive [1, 6, 7]. In addition, states that allowed only religious exemp-  
18 tions, rather than religious and personal beliefs, have low non-medical exemption rates [8],  
19 although they tend to increase faster over time [6]. Policy efforts to slow down non-medical  
20 exemptions may also sometimes have unpredictable results. For instance, adopting a stan-  
21 dardized form for exemption requests in order to better track exemptions may result in an  
22 increase in non-medical exemption rates [8]. This is because such a change may allow the  
23 emergence of resources facilitating the filing of exemptions by parents, resulting in effects  
24 opposite to the intended result.

25 The downstream impact of vaccination exemption policy on vaccination rates is also impor-

26 tant to consider. Childhood vaccination rates tend to be lower in states with more permissive  
27 exemption policies [9], and a recent analysis has shown that in states allowing personal belief  
28 exemptions, higher levels of exemptions were associated with lower levels of measles, mumps,  
29 and rubella (MMR) vaccination in children attending kindergarten in the school year 2016-  
30 2017 [10]. Change in vaccination mandates increasing the difficulty for parents to obtain  
31 non-medical exemptions have had positive impacts on vaccination rates, including in Wash-  
32 ington in 2011 [11] and California from the 2012-2013 school year [12]. However, assessing  
33 the association between policy changes and non-medical exemption rates remains necessary  
34 in other states and policy contexts. The success of California in eliminating non-medical  
35 exemptions comes in contrast with several failed legislative attempts in other states [9], even  
36 though the legality of non-medical exemption bans similar to the one implemented in Cali-  
37 fornia is not in question [13]. This variation in the success of legislative actions in reducing  
38 non-medical exemption rates demands that we assess variations in rates over consecutive  
39 years, in different policy and epidemiological contexts.

40 In this study, we focus on the epidemiological effects and spatial variations in non-medical  
41 exemption rates, and place it in the context of public health policies. We first assess the asso-  
42 ciation between state-level non-medical exemptions and vaccination rates for three common  
43 childhood diseases, all mandatory for school-aged children. Next, we focus on the state-level  
44 dynamics of non-medical exemption rates over several school years in a subset of states that  
45 have implemented recent vaccination policy changes. Finally, we examine how spatial het-  
46 erogeneity in non-medical exemption rates responds to policy changes at the county scale  
47 using four instances where legislative action to reduce accessibility to non-medical exemp-  
48 tions has recently been implemented, making them either harder to get or unavailable. Our  
49 analysis highlights how weak vaccination policies result in high non-medical exemption and  
50 low vaccination rates, producing hotspots of susceptible school-aged children for a number  
51 of vaccine-preventable infections. We advocate for aggressive public health policy changes  
52 to prevent further erosion in herd immunity for childhood diseases.

## 53 **Material and methods**

54 To assess the association between non-medical exemption rates and vaccination rates at the  
55 beginning of school years 2016-2017 and 2017-2018, we used data in kindergarten from 48  
56 states and the District of Columbia [14, 15]. No vaccination data were available for Oklahoma  
57 in 2016-2017, and neither vaccination or non-medical exemption rates were reported for  
58 Wyoming in both years. Oklahoma was thus excluded from the analysis in 2016-2017, and  
59 Wyoming was excluded in both years. Pennsylvania was also excluded from the analysis  
60 of the diphtheria, tetanus, and acellular pertussis (DTaP) vaccine in 2016-2017 because  
61 coverage data was not reported for this year [14]. We used a regression approach to test  
62 the associations between the proportion of non-medical exemption and vaccination rates.  
63 Because we are testing associations between proportions, we opted for a beta regression  
64 approach [16]. This analysis was run in R version 3.5.0 [17].

65 We identified a subset of states in which public health policies regarding non-medical exemp-  
66 tions have recently changed. Six states have made it harder to obtain non-medical exemptions  
67 between 2012 and 2016 [5]: Alaska (2013), Oregon (2014), Illinois (2015), Connecticut (2015),  
68 Missouri (2015), and Michigan (2015). In addition, in 2016, Vermont disallowed philosoph-  
69 ical exemptions to only allow religious exemptions [18]. Finally, the state of California has  
70 strengthened its school immunization policies twice in the past decade: non-medical exemp-  
71 tions were made harder to obtain in 2013, and in 2015 new non-medical exemptions were  
72 barred from the beginning of the 2016-2017 school year [19]. For these states, we compiled  
73 data on non-medical exemptions in kindergartens from the Centers for Disease Control and  
74 Prevention (CDC) online annual school report results between 2003-2004 and 2010-2011,  
75 and from published annual surveys from school year 2011-2012 to school year 2017-2018  
76 [20, 21, 22, 14, 23, 24, 15]. Data were not reported consistently for Illinois and Missouri for  
77 the period of 2012-2013 to 2016-2017. Because this period included the policy change, we  
78 did not include these two states in our analysis of policy changes. In addition, less than

79 10% of enrolled students were sampled in 2010-2011 and 2011-2012 in Alaska and these two  
80 years were not included in the dataset. We used a linear regression on years prior to the  
81 policy change to forecast NME rates in the absence of that change. In Vermont, we fitted  
82 the regression starting from school year 2008-2009, because of the sudden increase in NMEs  
83 during the school year 2007-2008. We would expect an effective policy change to lead to the  
84 data diverging from the forecasted trend.

85 Finally, we collected data on non-medical exemptions from state health departments at the  
86 county level in three states, including four instances of policy changes. In California, we  
87 obtained data on non-medical exemptions in kindergarten covering the period 2013-2014 up  
88 to 2016-2017, including two policy changes, at the beginning of the 2014-2015 and 2016-2017  
89 school years respectively. In Connecticut, we included data on non-medical exemptions in  
90 kindergarten for the school year prior and the school year following a policy change in 2015,  
91 including school years 2014-2015 and 2015-2016. Finally, in Illinois, we compiled data on non-  
92 medical exemptions in all school-aged children for the two years surrounding a policy change  
93 in 2015. Because Illinois only reports data for separate vaccines, exemptions specific for the  
94 MMR vaccine were used in that state. To analyze the spatial heterogeneity at the county  
95 level, and how the heterogeneity varied following policy changes, we computed *Moran's I*  
96 [25] for each state and year. We performed a spatial clustering analysis for each state before  
97 and after the change in policy using SatScan [26] with the Bernoulli model [27, 28], as this  
98 model is adapted to our situation where individuals have or do not have an exemption. This  
99 method detects clusters of counties with high exemption rates relative to the rest of counties  
100 in a state; the mean rate of "high" clusters thus varies between states and between clusters.  
101 Maps were created in Python 3.6.3 using the Plotly graphing library package [29].

102 All data used in the manuscript, and codes for the statistical analysis are available on Github  
103 at [github.com/Rom1Garnier/NME](https://github.com/Rom1Garnier/NME).

## 104 Results

105 Following the analysis of Olive et al. [10], we expected a negative association between non-  
106 medical exemptions and school-aged children vaccination levels. We extended their analysis  
107 for 2016-2017 to all states (irrespective of the breadth of the non-medical exemptions they  
108 allow) and found that higher rates of non-medical exemptions are associated with lower vac-  
109 cination rates for the MMR vaccine (Figure 1A; *beta regression*;  $p < 0.001$ ). Further, similar  
110 significant negative associations were present with two other common childhood vaccines  
111 included in the immunization mandates, DTaP (Figure 1B; *beta regression*;  $p = 0.002$ ) and  
112 varicella (Figure 1C; *beta regression*,  $p = 0.02$ ). We also obtained similar results for school  
113 year 2017-2018, with NMEs and vaccination rates being negatively associated (1D-F). Full  
114 results for the beta regressions can be found in Supplementary Table 1.

115 We considered how changes in state public health policies affected non-medical exemption  
116 rates between school years 2011-2012 and 2017-2018, focusing on a set of six states which  
117 have implemented policy changes (Figure 2). First, we show that in one instance (Vermont,  
118 2008), the levels of non-medical exemptions have increased rapidly from one year to the  
119 next. This was related to Vermont's new requirement for immunization against hepatitis  
120 B and varicella (two doses) being enforced at the beginning of the 2008-2009 school year.  
121 Following this sudden increase, non-medical exemption rates showed no trend between 2008  
122 and 2015 in Vermont (*linear regression*,  $p = 0.38$ ). In all other states, non-medical exemption  
123 rates increased significantly from school year 2003-2004 until the considered policy change  
124 (*linear regression*, all  $p \leq 0.007$ ). The difference between the forecasted levels of non-medical  
125 exemptions and the actual non-medical exemption rates allows the identification of a number  
126 of situations (Figure 2A). Policies making it harder to obtain non-medical exemptions appear  
127 to have no apparent effect, with rates continuing to increase at apparently similar rates after  
128 the policy change (Alaska, Connecticut). In all the other cases, decreases were observed,  
129 with some being temporary (Oregon), and others seemingly more durable (California in

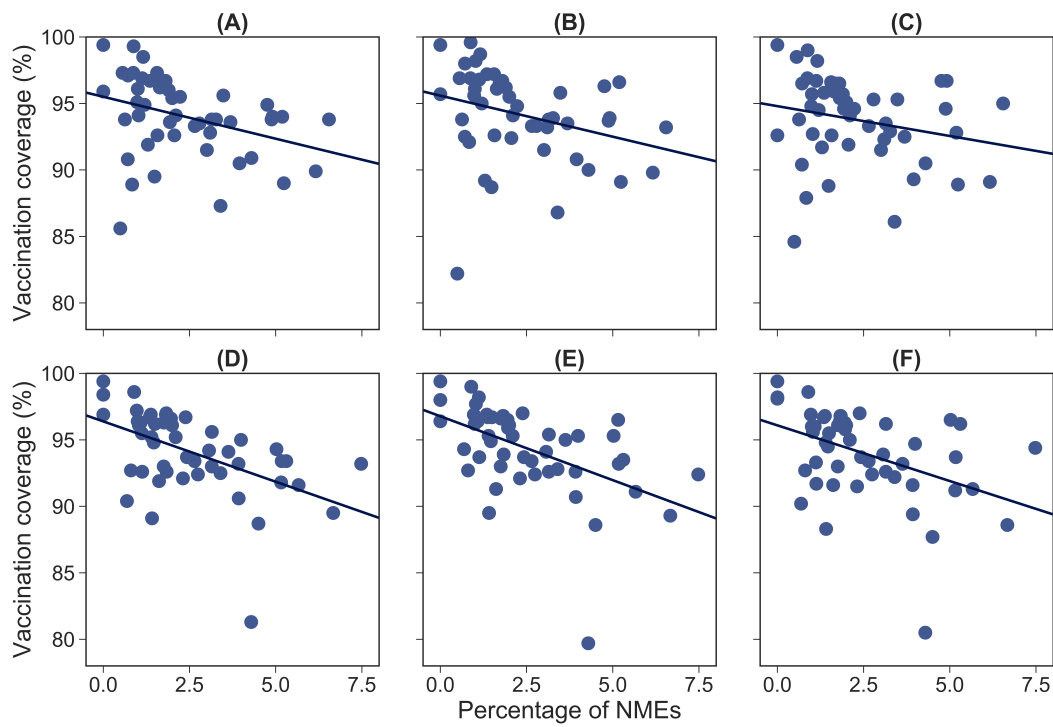

Figure 1: Association between percentages of non-medical exemptions and vaccination coverage at the state level in school year 2016-2017 (A-C) and school year 2017-2018 (D-F) for three common childhood vaccines: (A) Measles, Mumps, and Rubella (MMR); (B) Diphtheria, Tetanus, and acellular Pertussis (DTaP); (C) Varicella; (D) Measles, Mumps, and Rubella (MMR); (E) Diphtheria, Tetanus, and acellular Pertussis (DTaP); (F) Varicella.



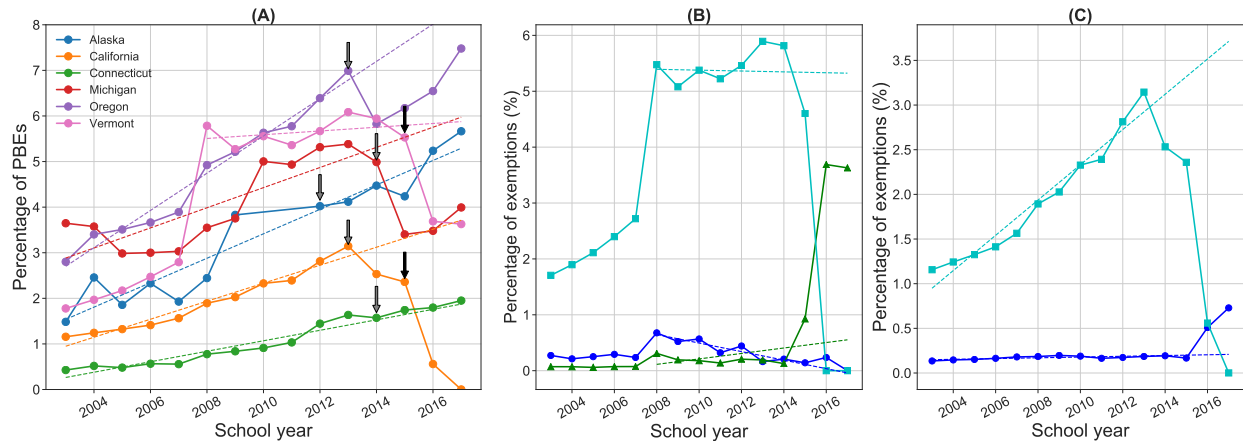

Figure 2: Dynamics of non-medical exemption rates between the school years 2003-2004 to 2016-2017. **(A)** In six states with recent exemption policy changes. The date of the policy change is indicated by an arrow. The solid line presents the data, while the dashed line represents the prediction of a linear regression fitted to the years prior to the first policy change in a state. The model was only fitted starting in 2008-2009 in Vermont. Black arrows indicate policies eliminating at least one type of NME; grey arrows indicate less stringent changes. **(B)** Dynamics of philosophical belief exemptions (light blue), religious exemptions (green), and medical exemptions (dark blue) in the state of Vermont. Solid lines represent the data, and dashed line represent predictions from a linear regression. **(C)** Details of the dynamics of total non-medical exemptions (light blue), and medical exemptions (dark blue) in the state of California. Solid lines represent the data, and dashed line represent predictions from a linear regression.

130 2014, Michigan). Finally, eliminating either the philosophical exemption in Vermont or  
 131 non-medical exemptions altogether in California appears to have the strongest effect on the  
 132 percentage of non-medical exemptions. However, in Vermont, the loss of philosophical belief  
 133 exemptions was partly compensated by a sharp increase in religious exemptions, from 0.1%  
 134 in school year 2014-2015 to 3.7% in 2016-2017 (Figure 2B). The decrease also appeared  
 135 much slower in the second year after philosophical exemptions were banned. Similarly, in  
 136 California, the sharp decrease in non-medical exemption rates was partly matched by a  
 137 concurrent increase of medical exemptions from 0.17% in 2015-2016 to 0.51% in 2016-2017  
 138 (Figure 2B), probably in relation to how California Senate Bill 277 has provided for more  
 139 physician discretion in the assessment of medical exemptions [19]. Reported exemption levels  
 140 reached near zero as early as 2017-2018.

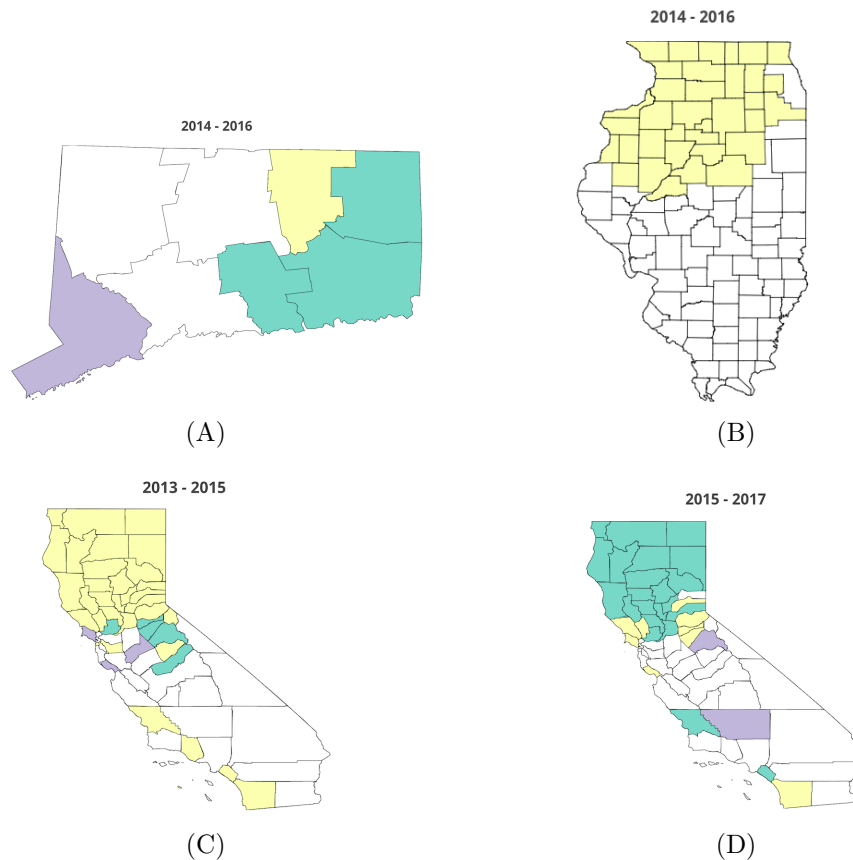

Figure 3: High non-medical exemption counties detected in a spatial clustering analysis performed for two school years surrounding a policy change. **(A)** Connecticut, school years 2014-2015 and 2015-2016; **(B)** Illinois, school years 2014-2015 and 2015-2016; **(C)** California, school years 2013-2014 and 2014-2015; **(D)** California, school years 2015-2016 and 2016-2017. Counties shaded in green belonged to a high non-medical exemption cluster only before the policy change; counties shaded in purple belonged to a high non-medical exemption cluster only after the policy change. Counties shaded in yellow belonged to a high non-medical exemption cluster both before and after the policy change.

141 Rates of non-medical exemptions in school-aged children showed spatial variability in all  
142 three states we focused on. However, we find that most policy changes have no significant  
143 effect on the mean and variance of non-medical exemption rates (Table 1). A reduction in  
144 both mean and variance of rates by county is only found between school years 2015-2016 and  
145 2016-2017 in California, in relation to new non-medical exemptions becoming unavailable.

146 We computed Moran's I in all states and years (Table 1). In Illinois, we find that there  
147 is significant spatial heterogeneity in both years, with limited changes to Moran's I before

| State       | School Year | Computed Moran's I | P-value Moran's I | Mean non-medical exemption rates | Std. dev. non-medical exemption rates |
|-------------|-------------|--------------------|-------------------|----------------------------------|---------------------------------------|
| Illinois    | 2014        | 0.04               | <0.001            | 0.67                             | 0.53                                  |
| Illinois    | 2015        | 0.05               | <0.001            | 0.7                              | 0.57                                  |
| California  | 2013        | 0.06               | <0.001            | 5.38                             | 4.7                                   |
| California  | 2014        | 0.04               | <0.001            | 5.92                             | 5.28                                  |
| California  | 2015        | 0.08               | <0.001            | 8.53                             | 7.75                                  |
| California  | 2016        | 0.01               | 0.06              | 0.61                             | 0.91                                  |
| Connecticut | 2014        | -0.15              | 0.96              | 1.89                             | 0.66                                  |
| Connecticut | 2015        | -0.16              | 0.82              | 2.07                             | 0.74                                  |

Table 1: Computed Moran's I, significance of Moran's I, and mean and standard deviation of non-medical exemption rates for three states (California, Connecticut, Illinois) for which data was available at the county level. Policy changes occur in year 2015 in Illinois, year 2014 and 2016 in California, and in 2015 in Connecticut.

148 and after the policy change (school year 2014-2015: *Moran's I*: 0.04; school year 2015-2016:  
149 *Moran's I*: 0.05). In California, spatial heterogeneity remained significant before and after the  
150 first policy change in 2014 (i.e. making non-medical exemptions difficult but not eliminating  
151 them), which only resulted in a limited decrease of spatial heterogeneity indicated by a  
152 Moran's I of 0.06 in school year 2013-2014 and a Moran's I of 0.04 in 2014-2015. However,  
153 most significantly, the second policy change eliminating non-medical exemptions resulted in  
154 a loss of spatial heterogeneity. Indeed, we found significant spatial heterogeneity in school  
155 year 2015-2016 (*Moran's I*: 0.08;  $p < 0.001$ ) but Moran's I becomes non-significant in school  
156 year 2016-2017 (*Moran's I*: 0.01;  $p = 0.06$ ). We find that there is no significant spatial  
157 heterogeneity in Connecticut both before and after the policy change. However, because  
158 Connecticut only has eight counties, this result needs to be taken with caution.

159 The spatial clustering analysis further shows how the policies impact the spatial distribution  
160 of non-medical exemptions (Figure 3, Supplementary Table 2). In Connecticut (Figure 3A),  
161 we identify different clusters between years indicating that spatial variation is present in both  
162 years, albeit with a shift in high risk groups. In Illinois (Figure 3B), the change in policy does  
163 not appear to have impacted the spatial clustering of non-medical exemptions. A single large  
164 cluster was identified in the northern part of the state both before and after the policy change.

165 Finally, in California, the two policy changes had different spatial impacts. The tightening  
166 of regulations around non-medical exemptions in 2014 appears to have had limited effects  
167 on spatial clustering of non-medical exemptions (Figure 3C), with a large cluster being  
168 identified in Northern California in both years. Conversely, this large cluster disappears  
169 in school year 2016-2017 and can only be identified in 2015-2016 (Figure 3D), indicating a  
170 large effect of Senate Bill 277, the legislation removing NMEs, on spatial heterogeneity in  
171 non-medical exemption rates. The large decrease in the mean percentage of exemptions of  
172 the remaining 'high' counties in California in 2016 further illustrates the effect of the policy  
173 change (Supplementary Table 2).

## 174 Discussion

175 We have shown that, aggregated at the state level, non-medical exemption rates and vac-  
176 cination rates are significantly associated for three major childhood vaccinations for which  
177 school immunization mandates exist. Furthermore, analyzing the dynamics of non-medical  
178 exemption in several states with policy change history, we showed that eliminating either a  
179 subset of exemptions (as in Vermont) or all non-medical exemptions (as in California) ap-  
180 pears most effective in reducing exemption rates overall. Finally, we showed that non-medical  
181 exemptions are clustered at the county level, and that only the most stringent policy change  
182 appeared to modify both the spatial heterogeneity and the mean and variance in non-medical  
183 exemption rates.

184 The association between childhood vaccination rates and non-medical exemptions has impor-  
185 tant implications for vaccine-preventable childhood infectious disease risk. This association,  
186 along with the heterogeneous spatial distribution of non-medical exemptions, creates pock-  
187 ets of eroded herd immunity where outbreaks of vaccine preventable diseases would be more  
188 likely [30]. Furthermore, we illustrate that this is true not only for MMR [10] but for a

189 wide range of childhood diseases. It is thus important to consider the compounded risk  
190 of all childhood diseases when evaluating the public health risk posed by non-medical ex-  
191 emptions. Individuals with non-medical exemptions have an increased risk of contracting  
192 vaccine-preventable diseases such as measles, and higher rates of exempted individuals in  
193 the population can increase the incidence of the disease in vaccine-protected populations  
194 [31]. Intentionally unvaccinated individuals indeed make up large proportions of cases in  
195 outbreaks of both measles and pertussis in the United States [32], and can unwittingly be  
196 the starting point of epidemics that may take hold in population with relatively high vacci-  
197 nation rates [33]. The potential co-circulation of childhood infections also raises concerns of  
198 immunological and ecological interference between the diseases [34, 35].

199 We highlight that policies that reduce the spatial heterogeneity and variance in non-medical  
200 exemption rates are key to eliminating pockets of susceptibility and minimizing the risk  
201 of childhood disease outbreaks. Our work suggests that making non-medical exemptions  
202 more difficult to obtain by increasing the administrative burden for parents is unlikely to  
203 achieve this goal. Only the complete removal of non-medical exemptions in California shows  
204 promise and may represent an effective policy tool. A similar spatial analysis of Vermont  
205 would be needed to assess whether the partial removal of NMEs has similar spatial effects.  
206 Additionally, we highlight that data at finer spatial scales could reveal the presence of these  
207 spatial effects below the county-scale.

208 We note that it is important to account for the effects of grand-fathered exemptions, i.e.  
209 in case of new laws restricting or eliminating exemptions, allowing children with existing  
210 exemptions to maintain their exempt status. Therefore, it may indeed take several years  
211 for existing non-medical exemptions to be grand-fathered, and, in the case of California, a  
212 zero non-medical exemption rate was estimated to only be achieved in 2022 even though  
213 no new non-medical exemptions have been granted since the beginning of school year 2016-  
214 2017 [36]. This means that return to optimal herd immunity levels may take several years.

215 However, the data available for the 2017-2018 school year indicates that NMEs are already  
216 at near zero, with only 5 NMEs left in the entire state [15]. The immediate benefits may  
217 also markedly differ depending on whether non-medical exemptions are granted for several  
218 years (as was the case in California) or whether they require annual renewal because of state  
219 or school policies [37].

220 We also argue that the context of what alternative exemptions are available to parents  
221 when access to some exemptions becomes more difficult needs to be taken into account  
222 to maximize the increase in vaccination coverage. Indeed, both the increase in religious  
223 exemptions in Vermont and in medical exemptions in California points towards parents  
224 seeking alternative exemptions whenever possible. The positive relationship between increase  
225 in medical exemptions and past rates of non-medical exemptions at the county level in  
226 California also supports this idea [19]. An increase in medical exemption could be expected in  
227 response to any increase in the difficult of obtaining non-medical exemptions [11]. However,  
228 states where non-medical exemptions are hard to obtain have only slightly higher medical  
229 exemption rates if the procedure to obtain these exemptions remains stringent [38]. The  
230 simplification of the medical exemption process in California, introduced in Senate Bill 277  
231 alongside the elimination of non-medical exemptions, may thus be partly to blame for the  
232 sharp increase in medical exemptions at the start of the 2016-2017 school year [19, 39]. While  
233 the child's healthcare professional is often in the best position to offer relevant counsel on  
234 immunization to vaccine-hesitant parents [40], parents may put pressure on providers to  
235 obtain medical exemptions and/or turn to more sympathetic providers [11]. Additionally,  
236 recent studies have shown a rise in conditional admissions after an exemption policy change  
237 [11] (which is not something we included in our analysis), thus further consideration of  
238 effect of this category of students is also needed [12]. Variable proportions of conditional  
239 admissions could, for instance, partly explain the noise in the association between NME rates  
240 and vaccination rates. We argue that, in order to maximize the effects of the elimination of  
241 (some) exemptions, efforts should be made to keep other types at least as difficult to obtain

242 as they were prior to the new policy.

243 More generally, the question of whether a model with only medical exemptions would be  
244 well accepted and/or enforceable in the United States is an open question [2, 41]. Monetary  
245 incentives have been suggested to discourage parents from obtaining non-medical exemptions,  
246 in particular in the form of fees [42]. The rationale is that fees would reduce the convenience  
247 of non-medical exemptions and result in increase of vaccination rates, while any money  
248 collected would help alleviate the financial burden that vaccine-exempt individuals place on  
249 taxpayers. Another possible option, used for instance in Australia, could be to tie welfare  
250 payments to children vaccination records [43]. However, in the context of the United States,  
251 this policy could be misguided: vaccine refusal has been shown to be more prevalent in higher  
252 socio-economic neighborhoods [44] where welfare payments may be uncommon. From an  
253 ethical standpoint, which approach is preferable between making non-medical exemptions  
254 harder to get through administrative or time-consuming hurdles, and outright elimination of  
255 non-medical exemptions is far from settled [45, 46]. Even though there is a strong legal basis  
256 that would allow states to ban non-medical exemptions [13], partial elimination targeting  
257 diseases whose transmission is primarily school based such as measles may be preferable  
258 to avoid further strengthening anti-vaccine sentiments [40]. Communication around the  
259 benefits and safety of vaccines should represent a key component of any elimination effort,  
260 even though education of vaccine-refusing parents has proven challenging [47]. In any case,  
261 while the exploration of models used in other countries around the world provides useful  
262 data, understanding the local and national context is likely to be key to the implementation  
263 of a successful policy aimed at maximizing vaccination rates and herd immunity [48].

264 The benefits of herd immunity for childhood infections cannot be overstated. The reduction  
265 of non-medical exemption rates through NME policies remains a powerful tool in the fight  
266 to maintain herd immunity. However, effective policies regarding vaccination exemptions  
267 require careful evaluation of the relative costs and benefits in the near- and long-term.

## 268 Acknowledgments

269 Research reported in this publication was supported by the National Institute Of General  
270 Medical Sciences of the National Institutes of Health under Award Number R01GM123007.  
271 The content is solely the responsibility of the authors and does not necessarily represent the  
272 official views of the National Institutes of Health.

## 273 References

- 274 [1] E. Wang, J. Clymer, C. Davis-Hayes, and A. Buttenheim. Nonmedical exemptions  
275 from school immunization requirements: a systematic review. *Am J Public Health*,  
276 104(11):e62–e84, 2014.
- 277 [2] J. Colgrove and A. Lowin. A tale of two states: Mississippi, West Virginia, and ex-  
278 emptions to compulsory school vaccination laws. *Health Aff (Millwood)*, 35(2):348–55,  
279 2016.
- 280 [3] J. Zipprich, K. Winter, J. Hacker, D. Xia, J. Watt, and K. Harriman. Measles outbreak -  
281 California, december 2014 - february 2015. *MMWR Morb Mortal Wkly Rep*, 64(6):153–  
282 154, 2015.
- 283 [4] M. S. Majumder, E. L. Cohn, S. R. Mekar, J. E. Huston, and J. S. Brownstein.  
284 Substandard vaccination compliance and the 2015 measles outbreak. *JAMA Pediatr*,  
285 169(5):494–5, 2015.
- 286 [5] S. B. Omer, R. M. Porter, K. Allen, D. A. Salmon, and R. A. Bednarczyk. Trends in  
287 kindergarten rates of vaccine exemption and state-level policy, 2011-2016. *Open Forum*  
288 *Infect Dis*, 5(2):ofx244, 2018.
- 289 [6] S. B. Omer, J. L. Richards, M. Ward, and R. A. Bednarczyk. Vaccination policies and  
290 rates of exemption from immunization, 2005-2011. *N Engl J Med*, 367(12):1170–1, 2012.



- 291 [7] S. B. Omer, W. K. Y. Pan, N. A. Halsey, S. Stokley, L. H. Moulton, A. M. Navar,  
292 M. Pierce, and D. A. Salmon. Nonmedical exemptions to school immunization require-  
293 ments - secular trends and association of state policies with pertussis incidence. *JAMA*,  
294 296(14):1757–1763, 2006.
- 295 [8] W. D. Bradford and A. Mandich. Some state vaccination laws contribute to greater  
296 exemption rates and disease outbreaks in the United States. *Health Aff (Millwood)*,  
297 34(8):1383–90, 2015.
- 298 [9] J. Shaw, E. M. Mader, B. E. Bennett, O. K. Vernyi-Kellogg, Y. T. Yang, and C. P.  
299 Morley. Immunization mandates, vaccination coverage, and exemption rates in the  
300 United States. *Open Forum Infect Dis*, 5(6):ofy130, 2018.
- 301 [10] J. K. Olive, P. J. Hotez, A. Damania, and M. S. Nolan. The state of the antivaccine  
302 movement in the United States: A focused examination of nonmedical exemptions in  
303 states and counties. *PLoS Med*, 15(6):e1002578, 2018.
- 304 [11] S. B. Omer, K. Allen, D. H. Chang, L. B. Guterman, R. A. Bednarczyk, A. Jordan,  
305 A. Buttenheim, M. Jones, C. Hannan, M. P. deHart, and D. A. Salmon. Exemptions  
306 from mandatory immunization after legally mandated parental counseling. *Pediatrics*,  
307 141(1):e20172364, 2018.
- 308 [12] A. M. Buttenheim, M. Jones, C. McKown, D. Salmon, and S. B. Omer. Conditional  
309 admission, religious exemption type, and nonmedical vaccine exemptions in california  
310 before and after a state policy change. *Vaccine*, 36(26):3789–3793, 2018.
- 311 [13] M. M. Mello, D. M. Studdert, and W. E. Parmet. Shifting vaccination politics - the  
312 end of personal-belief exemptions in california. *N Engl J Med*, 373(9):785–787, 2015.
- 313 [14] R. Seither, K. Calhoun, E. J. Street, J. Mellerson, C. L. Knighton, A. Tippins, and  
314 J. M. Underwood. Vaccination coverage for selected vaccines, exemption rates, and

- 315 provisional enrollment among children in kindergarten - United States, 2016-17 school  
316 year. *MMWR Morb Mortal Wkly Rep*, 66(40):1073–1080, 2017.
- 317 [15] J. L. Mellerson, C. B. Maxwell, C. L. Knighton, J. L. Kriss, R. Seither, and C. L.  
318 Black. Vaccination coverage for selected vaccines and exemption rates among children  
319 in kindergarten - united states 2017-2018 school year. *Morbidity and Mortality Weekly*  
320 *Report (MMWR)*, 67(40):1115–1122, 2018.
- 321 [16] Francisco Cribari-Neto and Achim Zeileis. Beta regression in R. *J Stat Softw*, 34(2):1–  
322 24, 2010.
- 323 [17] R Core Team. *R: A Language and Environment for Statistical Computing*. R Foundation  
324 for Statistical Computing, Vienna, Austria, 2013.
- 325 [18] Vermont Department of Health. Vermont immunization program - 2017 annual report.  
326 Report, Vermont Department of Health, 2017.
- 327 [19] P. L. Delamater, T. F. Leslie, and Y. T. Yang. Change in medical exemption from  
328 immunization in california after elimination of personal belief exemptions. *JAMA*,  
329 318(9):862–863, 2017.
- 330 [20] S. M. Greby, K. G. Wooten, C. L. Knighton, B. Avey, and S. Stokley. Vaccination  
331 coverage among children in kindergarten - United States, 2011-12 school year. *MMWR*  
332 *Morb Mortal Wkly Rep*, 61(33):647–652, 2012.
- 333 [21] R. Seither, K. Calhoun, C. L. Knighton, J. Mellerson, S. Meador, A. Tippins, S. M.  
334 Greby, and V. Dietz. Vaccination coverage among children in kindergarten - United  
335 States, 2014-15 school year. *MMWR Morb Mortal Wkly Rep*, 64(33):897–904, 2015.
- 336 [22] R. Seither, K. Calhoun, J. Mellerson, C. L. Knighton, E. Street, V. Dietz, and J. M.  
337 Underwood. Vaccination coverage among children in kindergarten - United States,  
338 2015-16 school year. *MMWR Morb Mortal Wkly Rep*, 65(39):1057–1064, 2016.

- 339 [23] R. Seither, S. Masalovich, C. L. Knighton, J. Mellerson, J. A. Singleton, and S. M.  
340 Greby. Vaccination coverage among children in kindergarten - United States, 2013-14  
341 school year. *MMWR Morb Mortal Wkly Rep*, 63(41):913–920, 2014.
- 342 [24] R. Seither, L. Shaw, C. L. Knighton, S. M. Greby, and S. Stokley. Vaccination coverage  
343 among children in kindergarten - United States, 2012-13 school year. *MMWR Morb*  
344 *Mortal Wkly Rep*, 62(30):607–612, 2013.
- 345 [25] E. Paradis, J. Claude, and K. Strimmer. APE: analyses of phylogenetics and evolution  
346 in R language. *Bioinformatics*, 20:289–290, 2004.
- 347 [26] M. Kulldorff. *SaTScan v9.6: Software for the spatial and space-time scan statistics*,  
348 2018.
- 349 [27] C. Aloe, M. Kulldorff, and B. R. Bloom. Geospatial analysis of nonmedical vaccine  
350 exemptions and pertussis outbreaks in the United States. *Proc Natl Acad Sci U S A*,  
351 114(27):7101–7105, 2017.
- 352 [28] M. Kulldorff. A spatial scan statistic. *Communications in Statistics: Theory and Meth-*  
353 *ods*, 26:1481–1496, 1997.
- 354 [29] Plotly Technologies Inc. *Collaborative data science*. Plotly Technologies Inc., Montreal,  
355 QC, 2015.
- 356 [30] S. B. Omer, D. A. Salmon, W. A. Orenstein, M. P. DeHart, and N. Halsey. Vaccine  
357 refusal, mandatory immunization, and the risks of vaccine-preventable diseases. *N Engl*  
358 *J Med*, 360:1981–8, 2009.
- 359 [31] D. A. Salmon, M. Haber, E. J. Gangarosa, L. Phillips, N. J. Smith, and R. T. Chen.  
360 Health consequences of religious and philosophical exemptions from immunization laws.  
361 individual and societal risks of measles. *JAMA*, 281(1):47–54, 1999.
- 362 [32] V. K. Phadke, R. A. Bednarczyk, D. A. Salmon, and S. B. Omer. Association be-

- 363        tween vaccine refusal and vaccine-preventable diseases in the United States: A review  
364        of measles and pertussis. *JAMA*, 315(11):1149–58, 2016.
- 365 [33] D. E. Sugerman, A. E. Barskey, M. G. Delea, I. R. Ortega-Sanchez, D. Bi, K. J. Ralston,  
366        P. A. Rota, K. Waters-Montijo, and C. W. Lebaron. Measles outbreak in a highly vacci-  
367        nated population, san diego, 2008: role of the intentionally undervaccinated. *Pediatrics*,  
368        125(4):747–55, 2010.
- 369 [34] Diane E Griffin. Measles virus-induced suppression of immune responses. *Immunol Rev*,  
370        236(1):176–189, 2010.
- 371 [35] P Rohani, CJ Green, NB Mantilla-Beniers, and BT Grenfell. Ecological interference  
372        between fatal diseases. *Nature*, 422(6934):885, 2003.
- 373 [36] P. L. Delamater, T. F. Leslie, and Y. T. Yang. A spatiotemporal analysis of non-medical  
374        exemptions from vaccination: California schools before and after SB277. *Soc Sci Med*,  
375        168:230–238, 2016.
- 376 [37] D. A. Salmon, S. B. Omer, L. H. Moulton, S. Stokley, M. P. DeHart, S. Lett, B. Norman,  
377        S. Teret, and N. A. Halsey. Exemptions to school immunization requirements: the role of  
378        school-level requirements, policies, and procedures. *Am J Public Health*, 95(3):436–440,  
379        2005.
- 380 [38] S. Stadlin, R. A. Bednarczyk, and S. B. Omer. Medical exemptions to school immu-  
381        nization requirements in the United States—association of state policies with medical  
382        exemption rates (2004-2011). *J Infect Dis*, 206(7):989–92, 2012.
- 383 [39] S. Mohanty, A. M. Buttenheim, C. M. Joyce, A. C. Howa, D. Salmon, and S. B. Omer.  
384        Experiences with medical exemptions after a change in vaccine exemption policy in  
385        california. *Pediatrics*, 142(5):e20181051, 2018.
- 386 [40] D. J. Opel, J. L. Schwartz, S. B. Omer, R. Silverman, J. Duchin, E. Kodish, D. S.

- 387 Diekema, E. K. Marcuse, and W. Orenstein. Achieving an optimal childhood vaccine  
388 policy. *JAMA Pediatr*, 171(9):893–896, 2017.
- 389 [41] D. J. Opel, M. P. Kronman, D. S. Diekema, E. K. Marcuse, J. S. Duchin, and E. Kodish.  
390 Childhood vaccine exemption policy: The case for a less restrictive alternative. *Pedi-*  
391 *iatrics*, 137(4), 2016.
- 392 [42] J. K. Billington and S. B. Omer. Use of fees to discourage nonmedical exemptions to  
393 school immunization laws in U.S. states. *Am J Public Health*, 106(2):269–70, 2016.
- 394 [43] Y. T. Yang and D. M. Studdert. Linking immunization status and eligibility for welfare  
395 and benefits payments: the australian ”no jab, no pay” legislation. *JAMA*, 317(8):803–  
396 804, 2017.
- 397 [44] Sandra Goldlust, Elizabeth C. Lee, Murali Haran, Pejman Rohani, and Shweta Bansal.  
398 Assessing the distribution and determinants of vaccine underutilization in the United  
399 States. *BioRxiv*, 2017.
- 400 [45] Mark Christopher Navin and Mark Aaron Largent. Improving nonmedical vaccine ex-  
401 emption policies: Three case studies. *Public Health Ethics*, 10(3):225–234, 2017.
- 402 [46] A. Giubilini, T. Douglas, and J. Savulescu. Liberty, fairness, and the ’contribution  
403 model’ for non-medical vaccine exemption policies: a reply to navin and largent. *Public*  
404 *Health Ethics*, 10(3):235–240, 2017.
- 405 [47] M. C. Navin, A. T. Kozak, and E. C. Clark. The evolution of immunization waiver  
406 education in michigan: A qualitative study of vaccine educators. *Vaccine*, 36(13):1751–  
407 1756, 2018.
- 408 [48] K. Attwell, M. C. Navin, P. L. Lopalco, C. Jestin, S. Reiter, and S. B. Omer. Recent  
409 vaccine mandates in the united states, europe and australia: A comparative study.  
410 *Vaccine*, 36(48):7377–7384, 2018.

## 411 Supplemental Material

| School year | Vaccine   | Estimate | p-value |
|-------------|-----------|----------|---------|
| 2016-2017   | MMR       | -13.929  | 0.001   |
| 2017-2018   | MMR       | -15.675  | <0.001  |
| 2016-2017   | DTaP      | -14.049  | 0.002   |
| 2017-2018   | DTaP      | -16.162  | <0.001  |
| 2016-2017   | Varicella | -10.036  | 0.021   |
| 2017-2018   | Varicella | -13.458  | <0.001  |

**Supplementary Table 1:** Estimates and p-values from the beta regression of NME rates and vaccination rates for each vaccine and school year at the state-level. All the associations are significant and negative, supporting a negative association between NMEs and vaccination rates.

| State | Year | Mean relative risk | Mean percent PBE (%) |
|-------|------|--------------------|----------------------|
| CA    | 2013 | 2.13               | 7.24                 |
| CA    | 2014 | 2.49               | 7.86                 |
| CA    | 2015 | 2.45               | 11.9                 |
| CA    | 2016 | 3.26               | 1.52                 |
| CT    | 2014 | 1.61               | 2.27                 |
| CT    | 2015 | 1.75               | 2.89                 |
| IL    | 2014 | 1.92               | 0.95                 |
| IL    | 2015 | 1.95               | 1                    |

**Supplementary Table 2:** Mean relative risk and mean percentages of personal belief exemptions (PBE) in clusters of "high" PBE rates detected using SatScan. Mean relative risk corresponds to the average of risk of high PBEs in counties detected as "high" risk by the SatScan algorithm relative to the rest of the counties in a given state and year.
